# Supplementary material for: Self-assembled layer-by-layer partially reduced graphene oxide–sulfur composites as lithium–sulfur battery cathodes
Source: Royal Society of Chemistry journal article supplement (doi:10.1039/c7ra12194f), 2018-01-01
Supplement: c7ra12194f1.pdf [file c7ra12194f1.pdf]

**Electronic supplementary information for**

**Self-assembled layer-by-layer partially reduced graphene oxide-sulfur composites  
as lithium-sulfur battery cathode**

Cen Yao,<sup>a</sup> Yu Sun,<sup>a</sup> Kaisen Zhao,<sup>a</sup> Tong Wu,<sup>a</sup> Alain Mauger,<sup>b</sup> Christian. M. Julien,<sup>b</sup> Lina Cong,<sup>a</sup> Jia Liu,<sup>a</sup> Haiming Xie,<sup>a,\*</sup> Liqun Sun,<sup>a,\*</sup>

<sup>a</sup>National & Local United Engineering Laboratory for Power Battery, Northeast Normal University, Changchun 130024, PR China

<sup>b</sup>Sorbonne University, UPMC University Paris 06, Institut de Minéralogie, de Physique des Matériaux et de Cosmochimie (IMPMC), CNRS UMR 7590, 4 Place Jussieu, 75005 Paris, France

**\*Corresponding authors:**

**Haiming Xie:** E-mail: [xiehm136@nenu.edu.cn](mailto:xiehm136@nenu.edu.cn)

**Liqun Sun:** E-mail: [sunlq446@nenu.edu.cn](mailto:sunlq446@nenu.edu.cn)

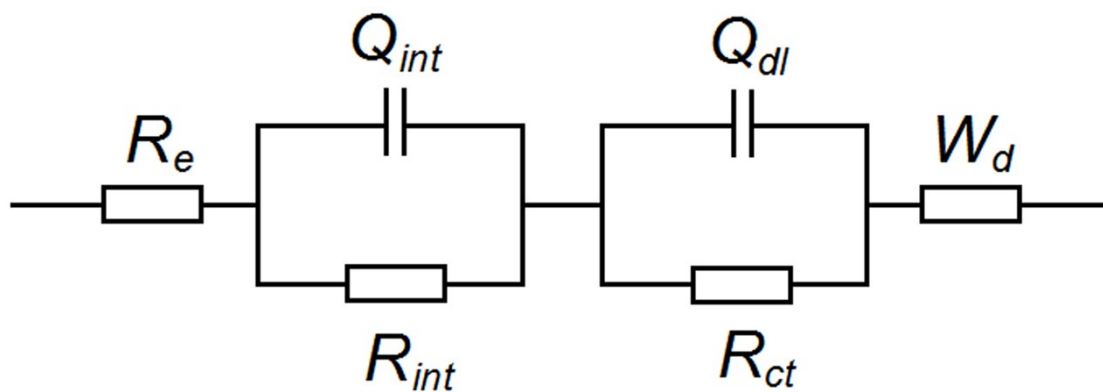

Figure S1. Equivalent circuit used in the simulation of impedance spectra. The fitting procedure, weighing modulus and circuit description codes are explained elsewhere.<sup>1</sup>

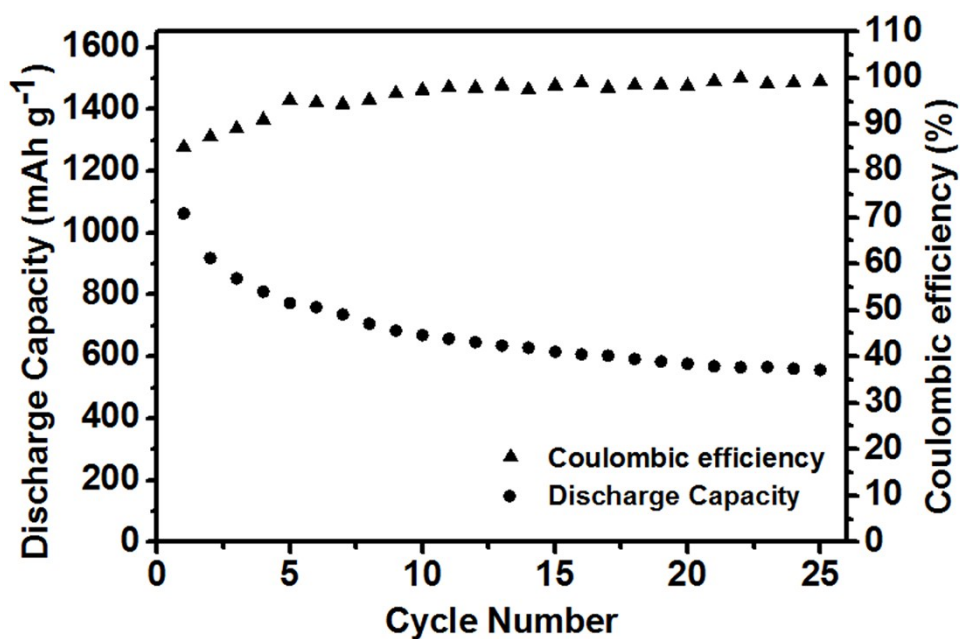

Figure S2. Cycling performance of prGO-240/S at 0.1 C.

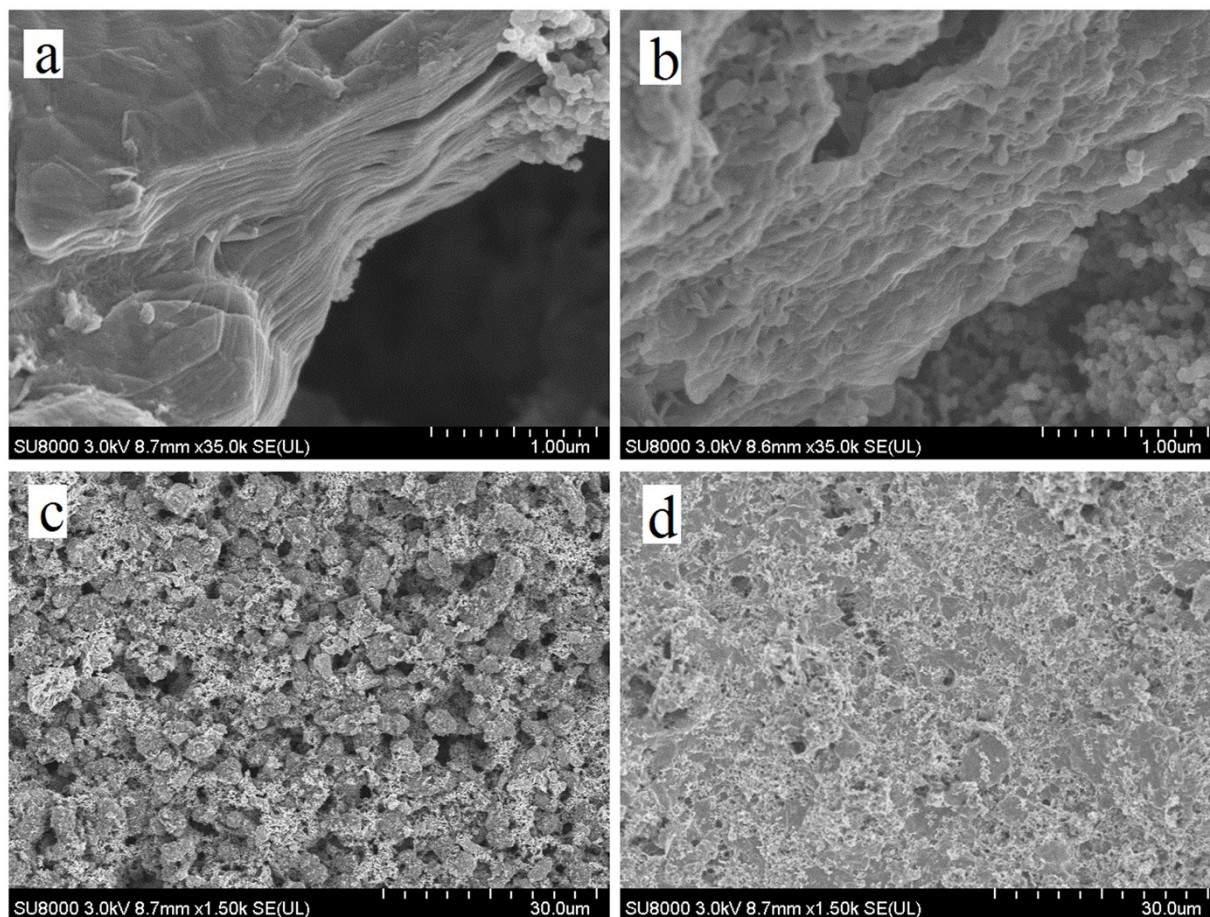

Figure S3. SEM characterization of prGO-120/S composite cathode. (a, c) Before cycling. (b, d) After 100 cycles. Scale bar,  $1\mu m$ (a, b),  $30\mu m$ (c, d)

Table S1. C/O ratios of prGO/S composites by XPS analysis.

| Samples   | pristine GO/S | prGO-30/S | prGO-60/S | prGO-120/S |
|-----------|---------------|-----------|-----------|------------|
| C/O ratio | 3.66          | 8.51      | 9.45      | 10.35      |

Graphene oxide, which has C/O ratio of 2/1, is none conductive. It usually has a conductivity of less than a micro S/m. To reduce graphene oxide to C/O ratio above 6 is required to make graphene oxide conductive by partially restoring the aromatic graphene structure. The conductivity of graphene oxide really depends on the degree of oxidation. In this article, partially reduced prGO-120/S provides higher conductivity, thus its electrochemical properties is better as shown in Fig. 8.

Table S2. Coulombic efficiency of prGO/S composites.

| Coulombic efficiency | prGO-30/S | prGO-60/S | prGO-120/S | prGO-120/S /prGO | prGO-120/S/prGO with prGO interlayer |
|----------------------|-----------|-----------|------------|------------------|--------------------------------------|
| The 1st cycle        | 83.4%     | 87.4%     | 89.25%     | 93.6%            | 98.6%                                |
| The 2nd cycle        | 82.8%     | 85.5%     | 88.6%      | 89.6%            | 99.3%                                |
| The 10th cycle       | 88.7%     | 90.5%     | 92.6%      | 98.0%            | 98.8%                                |
| The 50th cycle       | 89.4%     | 91.3%     | 94.6%      | 98.7%            | 99.3%                                |

During the first ten cycles, the instable coulombic efficiency corresponds to the surface side-reactions of the prGO/S composites. After 50 cycles, the coulombic efficiency of prGO-30/S and prGO-60/S composites decrease due to the relative irregular layer-by-layer structure compared with prGO-120/S composite. The coulombic efficiency was improved by prGO coating; however, it was still unstable in the first ten cycles. After adopting the prGO interlayer, the coulombic efficiency is around 99% from the first cycle indicating that the soluble intermediate polysulfides shuttle was prevented from the first charge-discharge process.

## Reference

1. Chakraborty Banerjee, P.; Singh Raman, R. K., *Electrochim. Acta*. 2011, 56, 3790-3798.
